# Supplementary material for: Improved Denitrification Performance of Polybutylene Succinate/Corncob Composite Carbon Source by Proper Pretreatment: Performance, Functional Genes and Microbial Community Structure
Source: MDPI journal article supplement (doi:10.3390/polym15040801), 2023-02-05
Supplement: s1 [file s1]

## Supplementary Materials

# **Improved denitrification performance of polybutylene succinate/corn cob composite carbon source by proper pretreatment: performance, functional genes and microbial community structure**

**Zhongchen Yang, Yanhong Lou, Hong Pan, Hui Wang, Quangang Yang, Yuping Zhuge \* and Jingying Hu**

National Engineering Research Center for Efficient Utilization of Soil and Fertilizer Resources, College of Resources and Environment, Shandong Agricultural University, Tai'an 271018, China

\* Correspondence: zhugeyp@sda.edu.cn

## **Cover sheet**

**12 pages, 1 Figure, 5 Tables**

**Figure S1.** The variations of TN removal efficiency (%) in different SPD systems

**Table S1.** Primers of target genes used in qPCR analysis

**Table S2.** The results of ANOVA for model (Response: TN removal efficiency)

**Table S3.** The optimized TN removal efficiency based on RSM

**Table S4.** The actual TN removal efficiency under optimized conditions

**Table S5.** Functional classification of major genera in bacterial and fungal communities

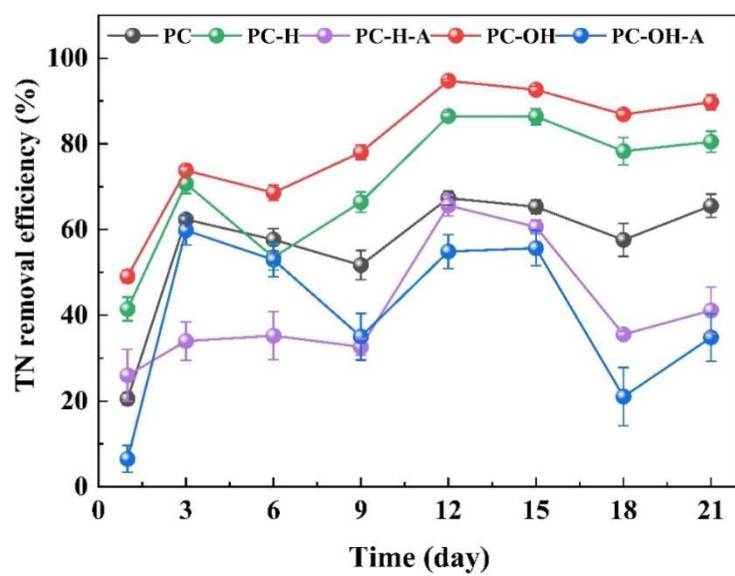

Figure S1. The variations of TN removal efficiency (%) in different SPD systems

**Table S1.** Primers of target genes used in qPCR analysis

| Target gene     | Primer      | Primer sequence (5'-3')              | References |
|-----------------|-------------|--------------------------------------|------------|
| AOB-amoA        | amoA-F      | GGGGTTTCTACTGGTGGT                   | [1]        |
|                 | amoA-R      | CCCCTCKGSAAAGCCTTCTTC                |            |
| AOA-amoA        | Arch-amoA-F | STAATGGTCTGGCTTAGACG                 | [2]        |
|                 | Arch-amoA-R | GCGGCCATCCATCTGTATGT                 |            |
| amx 16S rRNA    | AMX809F     | CCCGTAAACGATGGGCACT                  | [3]        |
|                 | AMX1066R    | AACGTCTCACGACACGAGCTG                |            |
| nrfA            | 6F          | GAY TGC CAY ATG CCRAAA GT            | [4]        |
|                 | 6R          | GCB KCT TTY GCT TCRAAG TG            |            |
| narG            | 1960m2f     | TA(CT)GT(GC)GGGCAGGA(AG)AAACTG       | [5]        |
|                 | 2050m2r     | CGTAGAAGAAGCTGGTGCTGTT               |            |
| napA            | napAz3F     | CGCGAACAAGCTGATGAAGG                 | [6]        |
|                 | napAz3R     | AAGATCATCGGGATGTCGGC                 |            |
| nirK            | nirK583F    | TCATGGTGCTGCCGCGKGCACGG              | [7]        |
|                 | nirK909R    | GAACCTGCCCGTKGCCAGAC                 |            |
| nirS            | nirScd3AF   | GT(C/G)AACGT(C/G)AAGGA(A/G)AC(C/G)GG | [8]        |
|                 | nirSR3cd    | GA(C/G)TTCGG(A/G)TG(C/G)GTCTTGA      |            |
| nosZ (clade I)  | nosZ-F      | CGYTGTTCMTCGACAGCCAG                 | [9]        |
|                 | nosZ1622R   | CGSACCTTSTTGCCSTYGCG                 |            |
| nosZ (clade II) | NosZ II-F   | CTIGGICCIYTKCAYAC                    | [10]       |
|                 | NosZ II-R   | GCIGARCARAAITCBGTRC                  |            |
| 16S rRNA        | 338F        | ACTCCTACGGGAGGCAGCAG                 | [11]       |
|                 | 518R        | ATTACCGCGGCTGCTGG                    |            |

**Table S2.** The results of ANOVA for model (Response: TN removal efficiency)

| Source                                           | Sum of Squares | Mean Square | F-value | p-value  | Note            |
|--------------------------------------------------|----------------|-------------|---------|----------|-----------------|
| Model                                            | 14,335.36      | 1791.92     | 375.42  | < 0.0001 | significant     |
| A: Pretreatment degree                           | 661.92         | 661.92      | 138.68  | < 0.0001 |                 |
| B: NO <sub>3</sub> <sup>-</sup> -N concentration | 1.82           | 1.82        | 0.3817  | 0.5539   |                 |
| C: Temperature                                   | 4247.86        | 4247.86     | 889.95  | < 0.0001 |                 |
| AB                                               | 29.06          | 29.06       | 6.09    | 0.0389   |                 |
| AC                                               | 350.25         | 350.25      | 73.38   | < 0.0001 |                 |
| A <sup>2</sup>                                   | 557.87         | 557.87      | 116.88  | < 0.0001 |                 |
| C <sup>2</sup>                                   | 45.42          | 45.42       | 9.51    | 0.0150   |                 |
| A <sup>2</sup> C                                 | 275.49         | 275.49      | 57.72   | < 0.0001 |                 |
| Residual                                         | 38.19          | 4.77        |         |          |                 |
| Lack of Fit                                      | 19.70          | 4.92        | 1.07    | 0.4763   | not significant |
| Pure Error                                       | 18.49          | 4.62        |         |          |                 |

**Table S3.** The optimized TN removal efficiency based on RSM

| Number | Pretreatment degree | NO <sub>3</sub> -N concentration<br>(mg L <sup>-1</sup> ) | Temperature<br>(°C) | TN removal efficiency<br>(%) | Desirability |          |
|--------|---------------------|-----------------------------------------------------------|---------------------|------------------------------|--------------|----------|
| 1      | 0.531594841         | 14.99992049                                               | 24.99999492         | 91.7825482                   | 0.907136944  | Selected |
| 2      | 0.541566294         | 14.99995107                                               | 24.99999287         | 91.77972237                  | 0.90710501   |          |
| 3      | 0.518194726         | 14.99996548                                               | 24.99998626         | 91.77798714                  | 0.907085401  |          |
| 4      | 0.556408009         | 14.99984071                                               | 24.9999679          | 91.76549526                  | 0.906944234  |          |
| 5      | 0.514431043         | 14.99975237                                               | 24.99695708         | 91.76101632                  | 0.906893619  |          |
| 6      | 0.516930336         | 14.9515668                                                | 24.999996           | 91.74704895                  | 0.906735777  |          |
| 7      | 0.574260425         | 14.999987                                                 | 24.99927943         | 91.7299519                   | 0.906542569  |          |
| 8      | 0.527468769         | 14.91194198                                               | 24.99997122         | 91.72837717                  | 0.906524773  |          |
| 9      | 0.54289957          | 14.84224007                                               | 24.99996163         | 91.68507708                  | 0.906035451  |          |
| 10     | 0.602493796         | 14.99998752                                               | 24.99316717         | 91.61588318                  | 0.905253511  |          |
| 11     | 0.581349547         | 14.77395506                                               | 24.99999791         | 91.59027334                  | 0.904964102  |          |
| 12     | 0.54990473          | 14.6311415                                                | 24.99999658         | 91.55679224                  | 0.904585741  |          |
| 13     | 0.643922214         | 14.99996155                                               | 24.99998757         | 91.44373761                  | 0.903308143  |          |
| 14     | 0.556633342         | 14.99993213                                               | 24.92751287         | 91.43401442                  | 0.903198264  |          |
| 15     | 0.538691273         | 14.37808752                                               | 24.99999191         | 91.40883124                  | 0.902913677  |          |
| 16     | 0.571483361         | 14.14258607                                               | 24.99995836         | 91.25500702                  | 0.901175353  |          |
| 17     | 0.571134892         | 14.08987423                                               | 24.99996186         | 91.22567152                  | 0.900843841  |          |
| 18     | 0.521745988         | 14.99981381                                               | 24.86749317         | 91.17542616                  | 0.900276033  |          |
| 19     | 0.547471514         | 13.59111174                                               | 24.99998589         | 90.94494318                  | 0.897671411  |          |
| 20     | 0.545220706         | 13.48399064                                               | 24.99998414         | 90.88007444                  | 0.896938348  |          |
| 21     | 0.562533931         | 13.38600826                                               | 24.99997245         | 90.82996255                  | 0.896372048  |          |
| 22     | 0.40711032          | 14.99979014                                               | 24.8402934          | 90.64868183                  | 0.894323447  |          |
| 23     | 0.737856439         | 14.99999838                                               | 24.99998823         | 90.64331207                  | 0.894262765  |          |
| 24     | 0.536140053         | 12.68423273                                               | 24.99998361         | 90.38958976                  | 0.891395522  |          |
| 25     | 0.588984756         | 12.44909535                                               | 24.99998057         | 90.29902295                  | 0.890372053  |          |
| 26     | 0.625869035         | 12.29107571                                               | 24.99996633         | 90.16572413                  | 0.888865681  |          |

|    |             |             |             |             |             |
|----|-------------|-------------|-------------|-------------|-------------|
| 27 | 0.550287797 | 12.12128899 | 24.99998998 | 90.08416199 | 0.887943971 |
| 28 | 0.503814944 | 12.35112249 | 24.99998863 | 90.08149896 | 0.887913877 |
| 29 | 0.582464377 | 11.66744719 | 24.99998512 | 89.86825469 | 0.885504065 |
| 30 | 0.537712775 | 11.60357795 | 24.99998916 | 89.7449247  | 0.884110348 |
| 31 | 0.549742663 | 14.99978399 | 24.54704018 | 89.71082378 | 0.883724983 |
| 32 | 0.550840692 | 11.282162   | 24.99999565 | 89.59348068 | 0.882398923 |
| 33 | 0.610280841 | 11.09808593 | 24.99999352 | 89.56853388 | 0.882117006 |
| 34 | 0.595122963 | 10.9259106  | 24.99999981 | 89.47229051 | 0.881029388 |
| 35 | 0.569010042 | 10.77471684 | 24.99997091 | 89.34740508 | 0.879618093 |
| 36 | 0.609586527 | 9.929180195 | 24.99999965 | 88.95450807 | 0.875178077 |
| 37 | 0.423745332 | 11.33066875 | 24.99997582 | 88.84222025 | 0.873909145 |
| 38 | 0.676552939 | 9.602779035 | 24.99997867 | 88.75626537 | 0.872937794 |
| 39 | 0.539759657 | 9.786983078 | 24.99999179 | 88.66588098 | 0.871916386 |
| 40 | 0.170456189 | 14.9999345  | 24.99998358 | 88.30812975 | 0.867873542 |
| 41 | 0.689044695 | 8.41780587  | 24.99999387 | 88.19944105 | 0.866645283 |
| 42 | 0.670229352 | 7.933929541 | 24.99999543 | 87.99669529 | 0.864354111 |
| 43 | 0.594057722 | 8.063881781 | 24.99999538 | 87.921734   | 0.863506995 |
| 44 | 0.628188755 | 7.504604196 | 24.99999468 | 87.73744623 | 0.861424412 |
| 45 | 0.638490472 | 7.396737572 | 24.99999929 | 87.70757093 | 0.8610868   |
| 46 | 0.478358006 | 8.849949819 | 24.99999785 | 87.64351675 | 0.860362942 |
| 47 | 0.664457973 | 6.688452474 | 24.99999937 | 87.41265394 | 0.857754028 |
| 48 | 0.690335763 | 6.551281806 | 24.99999757 | 87.37215836 | 0.857296399 |
| 49 | 0.727193388 | 6.569808941 | 24.99999038 | 87.35178189 | 0.857066131 |
| 50 | 0.681372027 | 6.21929638  | 24.9999975  | 87.21812825 | 0.855555749 |
| 51 | 0.72439268  | 5.86375389  | 24.99998327 | 87.06915055 | 0.853872195 |
| 52 | 0.699363174 | 5.764720489 | 24.99997352 | 87.03154422 | 0.853447217 |
| 53 | 0.70553712  | 5.642505755 | 24.99998178 | 86.9819027  | 0.852886232 |
| 54 | 0.725226957 | 5.645578283 | 24.99999699 | 86.97986697 | 0.852863227 |
| 55 | 0.688104044 | 5.557073965 | 24.9999848  | 86.92964767 | 0.852295713 |
| 56 | 0.762518755 | 5.596190498 | 24.99998612 | 86.89848073 | 0.851943505 |

|    |             |             |             |             |             |
|----|-------------|-------------|-------------|-------------|-------------|
| 57 | 0.724185032 | 5.262026788 | 24.99999635 | 86.82440369 | 0.851106381 |
| 58 | 0.726995289 | 5.146310342 | 24.99998914 | 86.77668726 | 0.850567152 |
| 59 | 0.694518245 | 5.135030111 | 24.99998494 | 86.75260842 | 0.850295044 |
| 60 | 0.52532684  | 6.694087824 | 24.99998673 | 86.69511565 | 0.849645335 |
| 61 | 0.760263002 | 5.000025213 | 24.98830257 | 86.63062766 | 0.848916574 |
| 62 | 0.070746843 | 14.9999879  | 24.99999923 | 86.12256274 | 0.843175079 |
| 63 | 0.239162787 | 5.000053866 | 24.99999378 | 80.4278857  | 0.778821174 |

---



**Table S4.** The actual TN removal efficiency under optimized conditions

| Number | Pretreatment degree | NO <sub>3</sub> -N concentration<br>(mg L <sup>-1</sup> ) | Temperature<br>(°C) | TN removal efficiency<br>(%) | Average TN removal<br>efficiency (%) |
|--------|---------------------|-----------------------------------------------------------|---------------------|------------------------------|--------------------------------------|
| 1      | 1                   | 15                                                        | 25                  | 90.09                        | 89.73                                |
| 2      | 1                   | 15                                                        | 25                  | 88.02                        |                                      |
| 3      | 1                   | 15                                                        | 25                  | 89.72                        |                                      |
| 4      | 1                   | 15                                                        | 25                  | 92.84                        |                                      |
| 5      | 1                   | 15                                                        | 25                  | 88.98                        |                                      |

**Table S5.** Functional classification of major genera in bacterial and fungal communities

| <b>Microbial Functions</b> | <b>Bacterial community</b>                                                                                                                                                                                                                                                                                                                                                              | <b>Fungal community</b>                                                                                                                     |
|----------------------------|-----------------------------------------------------------------------------------------------------------------------------------------------------------------------------------------------------------------------------------------------------------------------------------------------------------------------------------------------------------------------------------------|---------------------------------------------------------------------------------------------------------------------------------------------|
| Denitrification            | Curvibacter [12], Allorhizobium-Neorhizobium-Pararhizobium-Rhizobium [13], Kaistia [14], Enterobacter [15], Sphingomonas [16], Chryseobacterium [17], Selenomonas [18], Ralstonia [19], Bosea [20], Haliangium [21], Cupriavidus [22], Burkholderia-Caballeronia-Paraburkholderia [23], Variovorax [24], Herbaspirillum [25], Diaphorobacter [26], Xanthobacter [27], Paludibacter [28] |                                                                                                                                             |
| Lignocellulose degradation | Dysgonomonas [29], Reyranella [30], Cellulomonas [31], Propionispira [32], Pleomorphomonas [33], Novosphingobium [34]                                                                                                                                                                                                                                                                   | Chaetomium [35], Fusarium [36], Trichoderma [37], Paracremonium [38], Humicola [39], Apiotrichum [40], Staphylotrichum [41], Ascobolus [42] |

## References

1. Rotthauwe, J. H.; Witzel, K. P.; Liesack, W. The ammonia monooxygenase structural gene amoA as a functional marker: molecular fine-scale analysis of natural ammonia-oxidizing populations. *Appl. Environ. Microbiol.* **1997**, *63*, 4704-4712.
2. Francis, C. A.; Roberts, K. J.; Beman, J. M.; Santoro, A. E.; Oakley, B. B. Ubiquity and diversity of ammonia-oxidizing archaea in water columns and sediments of the ocean. *PNAS* **2005**, *102*, 14683-14688.
3. Tsushima, I.; Kindaichi, T.; Okabe, S. Quantification of anaerobic ammonium-oxidizing bacteria in enrichment cultures by real-time PCR. *Water Res.* **2007**, *41*, 785-794.
4. Takeuchi, J. Habitat segregation of a functional gene encoding nitrate ammonification in estuarine sediments. *Geomicrobiol. J.* **2006**, *23*, 75-87.
5. López-Gutiérrez, J. C.; Henry, S.; Hallet, S.; Martin-Laurent, F.; Catroux, G.; Philippot, L. Quantification of a novel group of nitrate-reducing bacteria in the environment by real-time PCR. *J. Microbiol. Methods* **2004**, *57*, 399-407.
6. Bru, D.; Sarr, A.; Philippot, L. Relative abundances of proteobacterial membrane-bound and periplasmic nitrate reductases in selected environments. *Appl. Environ. Microbiol.* **2007**, *73*, 5971-5974.
7. Liu, X.; Tiquia, S. M.; Holguin, G.; Wu, L.; Nold, S. C.; Devol, A. H.; Luo, K.; Palumbo, A. V.; Tiedje, J. M.; Zhou, J. Molecular diversity of denitrifying genes in continental margin sediments within the oxygen-deficient zone off the Pacific coast of Mexico. *Appl. Environ. Microbiol.* **2003**, *69*, 3549-3560.
8. Kandeler, E.; Deiglmayr, K.; Tschirko, D.; Bru, D.; Philippot, L. Abundance of narG, nirS, nirK, and nosZ genes of denitrifying bacteria during primary successions of a glacier foreland. *Appl. Environ. Microbiol.* **2006**, *72*, 5957-5962.
9. Li, X.; Wang, H.; Hu, C.; Yang, M.; Hu, H.; Niu, J. Characteristics of biofilms and iron corrosion scales with ground and surface waters in drinking water distribution systems. *Corros Sci* **2015**, *90*, 331-339.
10. Jones, C. M.; Graf, D. R.; Bru, D.; Philippot, L.; Hallin, S. The unaccounted yet abundant nitrous oxide-reducing microbial community: a potential nitrous oxide sink. *The ISME journal* **2013**, *7*, 417-426.
11. Muyzer, G.; De Waal, E. C.; Uitterlinden, A. Profiling of complex microbial populations by denaturing gradient gel electrophoresis analysis of polymerase chain reaction-amplified genes coding for 16S rRNA. *Appl. Environ. Microbiol.* **1993**, *59*, 695-700.
12. Zielińska, M.; Rusanowska, P.; Jarzabek, J.; Nielsen, J. L. Community dynamics of denitrifying bacteria in full-scale wastewater treatment plants. *Environ. Technol.* **2016**, *37*, 2358-2367.
13. He, X.; Zhang, S.; Jiang, Y.; Li, M.; Yuan, J.; Wang, G. Influence mechanism of filling ratio on solid-phase denitrification with polycaprolactone as biofilm carrier. *Bioresour. Technol.* **2021**, *337*, 125401.
14. Wang, C.; Zhu, G.; Wang, Y.; Wang, S.; Yin, C. Nitrous oxide reductase gene (nosZ) and N<sub>2</sub>O reduction along the littoral gradient of a eutrophic freshwater lake. *J Environ Sci* **2013**, *25*, 44-52.
15. Zhou, B.; Duan, J.; Xue, L.; Zhang, J.; Yang, L. Effect of plant-based carbon source supplements on denitrification of synthetic wastewater: focus on the microbiology. *Environ. Sci. Pollut. Res.* **2019**, *26*, 24683-24694.
16. Li, H.; Zhou, Z.; Liu, Q.; Dong, H.; Duan, Y.; Li, C.; Zhang, J.; Tan, H. Biological denitrification in high salinity wastewater using semen litchi as a carbon source. *Rsc Advances* **2015**, *5*, 92836-92842.
17. Kundu, P.; Pramanik, A.; Dasgupta, A.; Mukherjee, S.; Mukherjee, J. Simultaneous heterotrophic nitrification and aerobic denitrification by *Chryseobacterium* sp. R31 isolated from abattoir wastewater. *BioMed Res. Int.* **2014**, 2014.
18. Greening, C.; Geier, R.; Wang, C.; Woods, L. C.; Morales, S. E.; McDonald, M. J.; Rushton-Green, R.; Morgan, X. C.; Koike, S.; Leahy, S. C.; Kelly, W. J.; Cann, I.; Attwood, G. T.; Cook, G. M.; Mackie, R. I. Alternative hydrogen uptake pathways suppress methane production in ruminants. *bioRxiv* **2018**, 486894.
19. Xiao, Y.; Zheng, Y.; Wu, S.; Yang, Z. H.; Zhao, F. Bacterial community structure of autotrophic denitrification biocathode by 454 pyrosequencing of the 16S rRNA gene. *Microb. Ecol.* **2015**, *69*, 492-499.
20. Miller, M. N.; Dandie, C. E.; Zebbarth, B. J.; Burton, D. L.; Goyer, C.; Trevors, J. T. Influence of carbon amendments on soil denitrifier abundance in soil microcosms. *Geoderma* **2012**, *170*, 48-55.
21. Wang, H.; Sun, Y.; Zhang, L.; Wang, W.; Guan, Y. Enhanced nitrogen removal and mitigation of nitrous oxide emission potential in a lab-scale rain garden with internal water storage. *J. Water Process. Eng.* **2021**, *42*, 102147.

22. Xie, C. H.; Yokota, A. Reclassification of [Flavobacterium] ferrugineum as Terrimonas ferruginea gen. nov., comb. nov., and description of Terrimonas lutea sp. nov., isolated from soil. *Int. J. Syst. Evol. Microbiol.* **2006**, *56*, 1117-1121.
23. Hetz, S. A.; Horn, M. A. *Burkholderiaceae* are key acetate assimilators during complete denitrification in acidic cryoturbated peat circles of the arctic tundra. *Front. Microbiol.* **2021**, *12*, 628269.
24. Liu, D.; Li, J.; Li, C.; Deng, Y.; Zhang, Z.; Ye, Z.; Zhu, S. Poly (butylene succinate)/bamboo powder blends as solid-phase carbon source and biofilm carrier for denitrifying biofilters treating wastewater from recirculating aquaculture system. *Sci. Rep.* **2018**, *8*, 1-12.
25. Bonato, P.; Batista, M. B.; Camilios-Neto, D.; Pankiewicz, V. C.; Tadra-Sfeir, M. Z.; Monteiro, R. A.; Pedrosa, F. O.; Souza, E. M.; Chubatsu, L. S.; Wasseem, R.; Rigo, L. U. RNA-seq analyses reveal insights into the function of respiratory nitrate reductase of the diazotroph *Herbaspirillum seropedicae*. *Environ. Microbiol.* **2016**, *18*, 2677-2688.
26. Wang, J.; Chu, L. Biological nitrate removal from water and wastewater by solid-phase denitrification process. *Biotechnol. Adv.* **2016**, *34*, 1103-1112.
27. King, G. M. Nitrate-dependent anaerobic carbon monoxide oxidation by aerobic CO-oxidizing bacteria. *FEMS Microbiol. Ecol.* **2006**, *56*, 1-7.
28. Qiu, Y. L.; Kuang, X. Z.; Shi, X. S.; Yuan, X. Z.; Guo, R. B. *Paludibacter jiangxiensis* sp. nov., a strictly anaerobic, propionate-producing bacterium isolated from rice paddy field. *Arch. Microbiol.* **2014**, *196*, 149-155.
29. Soares, L. A.; Silva Rabelo, C. A. B.; Sakamoto, I. K.; Silva, E. L.; Varesche, M. B. A. Screening and bioprospecting of anaerobic consortia for biofuel production enhancement from sugarcane bagasse. *Appl. Biochem. Biotechnol.* **2020**, *190*, 232-251.
30. Song, W. F.; Wang, J. W.; Yan, Y. C.; An, L. Y.; Zhang, F.; Wang, L.; Xu, Y.; Tian, M. Z.; Nie, Y.; Wu, X. L. Shifts of the indigenous microbial communities from reservoir production water in crude oil- and asphaltene-degrading microcosms. *Int. Biodeterior. Biodegrad.* **2018**, *132*, 18-29.
31. Rusznyak, A.; Toth, E. M.; Schumann, P.; Spröer, C.; Makk, J.; Szabo, G.; Vladar, P.; Marialigeti, K.; Borsodi, A. K. *Cellulomonas phragmiteti* sp. nov., a cellulolytic bacterium isolated from reed (*Phragmites australis*) periphyton in a shallow soda pond. *Int. J. Syst. Evol. Microbiol.* **2011**, *61*, 1662-1666.
32. Xafenias, N.; Anunobi, M. O.; Mapelli, V. Electrochemical startup increases 1, 3-propanediol titers in mixed-culture glycerol fermentations. *Process Biochem.* **2015**, *50*, 1499-1508.
33. Chang, J. J.; Lin, J. J.; Ho, C. Y.; Chin, W. C.; Huang, C. C. Establishment of rumen-mimic bacterial consortia: a functional union for bio-hydrogen production from cellulosic bioresource. *Int. J. Hydrog. Energy* **2010**, *35*, 13399-13406.
34. Wang, J.; Wang, C.; Li, J.; Bai, P.; Li, Q.; Shen, M.; Li, R.; Li, T.; Zhao, J. Comparative genomics of degradative *Novosphingobium* strains with special reference to microcystin-degrading *Novosphingobium* sp. THN1. *Front. Microbiol.* **2018**, *9*, 2238.
35. Darwish, A. M.; Abdel-Azeem, A. M. Chaetomium enzymes and their applications, Recent Developments on Genus Chaetomium. *Springer*, **2020**, 241-249.
36. Huang, Y.; Busk, P. K.; Lange, L. Cellulose and hemicellulose-degrading enzymes in *Fusarium commune* transcriptome and functional characterization of three identified xylanases. *Enzyme Microb. Technol.* **2015**, *73*, 9-19.
37. Novy, V.; Nielsen, F.; Seiboth, B.; Nidetzky, B. The influence of feedstock characteristics on enzyme production in *Trichoderma reesei*: a review on productivity, gene regulation and secretion profiles. *Biotechnol. Biofuels* **2019**, *12*, 1-16.
38. Qi, W.; Taherzadeh, M. J.; Ruan, Y.; Deng, Y.; Chen, J. S.; Lu, H. F.; Xu, X. Y. Denitrification performance and microbial communities of solid-phase denitrifying reactors using poly (butylene succinate)/bamboo powder composite. *Bioresour. Technol.* **2020**, *305*, 123033.
39. Steindorff, A. S.; Serra, L. A.; Formighieri, E. F.; de Faria, F. P.; Poças-Fonseca, M. J.; de Almeida, J. R. M. Insights into the Lignocellulose-Degrading Enzyme System of *Humicola grisea* var. *thermoidea* Based on Genome and Transcriptome Analysis. *Microbiol. Spectr.* **2021**, *9*, e01088-21.
40. Štursová, M.; Žifčáková, L.; Leigh, M. B.; Burgess, R.; Baldrian, P. Cellulose utilization in forest litter and soil: identification of bacterial and fungal decomposers. *FEMS Microbiol. Ecol.* **2012**, *80*, 735-746.
41. Ali, A.; Ellinger, B.; Brandt, S. C.; Betzel, C.; Rühl, M.; Wrenger, C.; Schlüter, H.; Schäfer, W.; Brognaro, H.; Gand, M. Genome and Secretome Analysis of *Staphylotrichum longicolleum* DSM105789 Cultured on Agro-Residual and Chitinous Biomass. *Microorganisms* **2021**, *9*, 1581.
42. Tian, X.; Yang, T.; He, J.; Chu, Q.; Jia, X.; Huang, J. Fungal community and cellulose-degrading genes in the composting process of Chinese medicinal herbal residues. *Bioresour. Technol.* **2017**, *241*, 374-383.
